# Supplementary material for: A Pressure Sensing System for Heart Rate Monitoring with Polymer-Based Pressure Sensors and an Anti-Interference Post Processing Circuit
Source: Sensors (Basel). 2015 Feb 2;15(2):3224–35. doi: 10.3390/s150203224 (PMC4367356; doi:10.3390/s150203224)
Supplement: Supplementary file 1 [file sensors-15-03224-s001.pdf]

## Supplementary Information

## A Pressure Sensing System for Heart Rate Monitoring with Polymer-Based Pressure Sensors and an Anti-Interference Post Processing Circuit. *Sensors* 2015, 15, 3224-3235

Yi Shu <sup>†</sup>, Cheng Li <sup>†</sup>, Zhe Wang, Wentian Mi, Yuxing Li and Tian-Ling Ren <sup>\*</sup>

Institute of Microelectronics and Tsinghua National Laboratory for Information Science and Technology (TNList), Tsinghua University, Beijing 100084, China;

E-Mails: shuy11@mails.tsinghua.edu.cn (Y.S.); lic71317@gmail.com (C.L.);

wangzhe.thu2012@gmail.com (Z.W.); miwentian@gmail.com (W.M.)

qhlyx\_1992@163.com (Y.L.)

<sup>†</sup> These authors contributed equally to this work.

<sup>\*</sup> Author to whom correspondence should be addressed; E-Mail: rentl@tsinghua.edu.cn; Tel.: +86-10-6279-8569.

### The Temperature Dependence of the Flexible Pressure Sensor

A new temperature control device has been installed on our experimental setup and the temperature dependence test has been conducted with the results plotted in figure below.

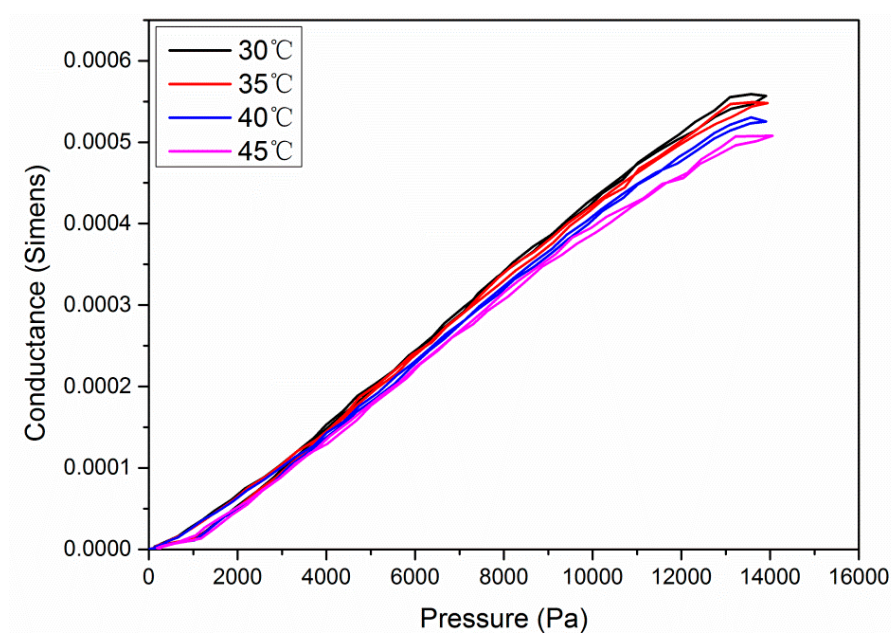

**Figure S1.** The temperature dependence of the flexible pressure sensor.

As the temperature rises from 30 °C to 45 °C, the device output conductance shows a small drift to lower values. The curve slopes at different temperatures and the fitted temperature coefficients are listed below.

**Table S1.** Performance variation under different temperature and the temperature coefficient.

| <b>30 °C</b>         | <b>35 °C</b>           | <b>40 °C</b>           | <b>45 °C</b>           | <b>Temperature Coefficient</b> |
|----------------------|------------------------|------------------------|------------------------|--------------------------------|
| $0.4 \times 10^{-4}$ | $0.393 \times 10^{-4}$ | $0.378 \times 10^{-4}$ | $0.361 \times 10^{-4}$ | $-2.6 \times 10^{-7}$          |
| Siemens/KPa          | Siemens/KPa            | Siemens/KPa            | Siemens/KPa            | Siemens/(KPa·K)                |

© 2015 by the authors; licensee MDPI, Basel, Switzerland. This article is an open access article distributed under the terms and conditions of the Creative Commons Attribution license (<http://creativecommons.org/licenses/by/4.0/>).
